# Supplementary material for: Assessment of the Tribological Performance of Electrospun Lignin Nanofibrous Web-Thickened Bio-Based Greases in a Nanotribometer
Source: MDPI journal article supplement (doi:10.3390/nano13212852), 2023-10-27
Supplement: s1 [file s1]

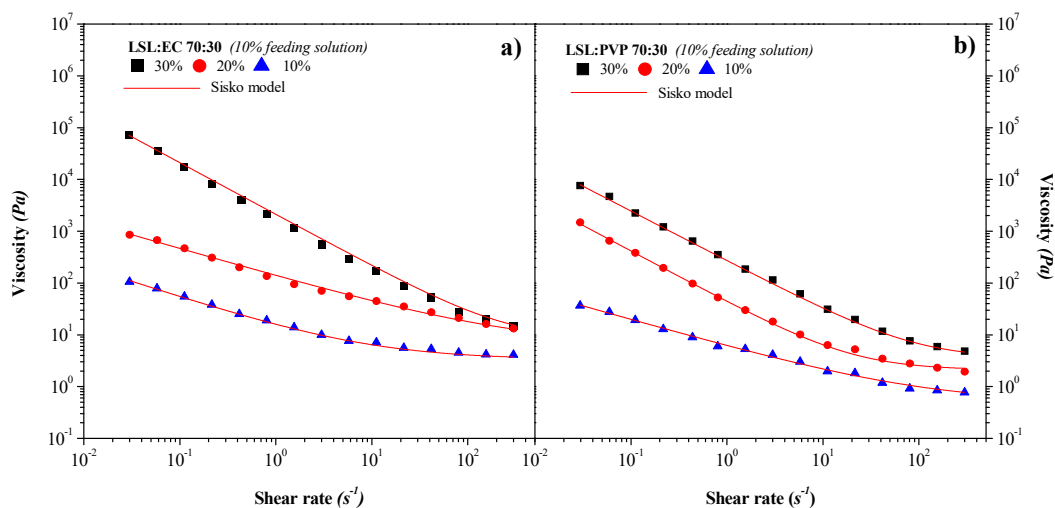

**Figure S1.** Viscosity vs. shear rate plots for lubricating greases thickened with a) 70:30 LSL/EC and b) 70:30 LSL/PVP electrospun nanostructures, at different concentrations (10%, 20% and 30% wt).

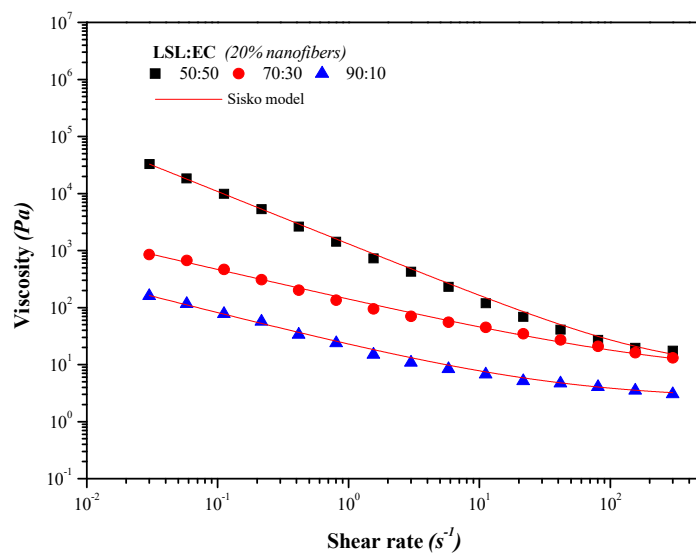

**Figure S2.** Viscosity vs. shear rate plots for lubricating greases thickened with LSL/EC electrospun nanostructures differing in the LSL:EC weight ratio (thickener concentration 20% wt).

**Table S1.** Values of the Sisko model parameters obtained from the fitting of the viscous flow curves of greases thickened with electrospun nanostructures to eq. (1).

| LSL:co-spinning polymer ratio (w/w) | Thickener concentration (wt.%) | $K$ (Pa s <sup>n</sup> ) | $n$ (-) | $\eta_0$ (Pa·s) |
|-------------------------------------|--------------------------------|--------------------------|---------|-----------------|
| 50:50 LSL:EC                        | 10                             | 119.1                    | 0.31    | 4.7             |
|                                     | 20                             | 1297.4                   | 0.08    | 8.5             |
| 70:30 LSL:EC                        | 10                             | 12.7                     | 0.43    | 3.3             |
|                                     | 20                             | 134.5                    | 0.49    | 6.4             |
|                                     | 30                             | 2111.7                   | 0.001   | 8.4             |
| 90:10 LSL:EC                        | 20                             | 20.5                     | 0.40    | 2.5             |
|                                     | 30                             | 59.1                     | 0.59    | 3.9             |
| 50:50 LSL:PVP                       | 10                             | 9.4                      | 0.32    | 1.2             |
| 70:30 LSL:PVP                       | 10                             | 5.75                     | 0.47    | 0.5             |
|                                     | 20                             | 42.4                     | 0.01    | 2.1             |
|                                     | 30                             | 268.5                    | 0.04    | 3.5             |
| 90:10 LSL:PVP                       | 30                             | 5.69                     | 0.47    | 3.9             |

**Table S2.** Friction coefficient values obtained using castor oil as lubricant.

| Normal force (mN) | Friction coefficient (-) |
|-------------------|--------------------------|
| 400               | 0.061±0.004              |
| 700               | 0.055±0.002              |
| 900               | 0.063±0.001              |

**Table S3.** Oil separation after centrifugation for selected greases thickened with different electrospun LSL:EC nanostructures (obtained from 10% feeding solutions).

| LSL:EC ratio (w/w) | Thickener concentration (wt.%) | Oil separation (wt. %) |
|--------------------|--------------------------------|------------------------|
| 50:50              | 10                             | 4                      |
|                    | 20                             | 0                      |
| 70:30              | 10                             | 43                     |
|                    | 20                             | 5                      |
|                    | 30                             | 0                      |
| 90:10              | 20                             | 70                     |
|                    | 30                             | 24                     |

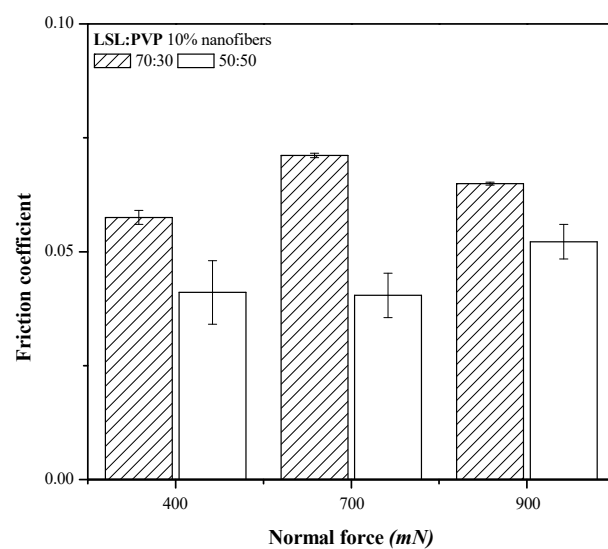

**Figure S3.** Values of the friction coefficient obtained with lubricating greases thickened with LSL/PVP electrospun nanostructures with different LSL:PVP ratios (10% nanofiber concentration).
